# Supplementary material for: The Mutability of Yeast Prions
Source: MDPI journal article supplement (doi:10.3390/v14112337), 2022-10-25
Supplement: s1 [file s1]

**Table S1.** Cytoduction of [*PSI*<sup>+</sup>] variants (left) that require higher Sup35 expression for propagation.

|    | Hsp104 <sup>WT</sup> & Sup35 overexpression |                             |    |    |    |
|----|---------------------------------------------|-----------------------------|----|----|----|
|    | Same                                        | [ <i>psi</i> <sup>-</sup> ] | VH | VK | VL |
| A2 | 15                                          | 4                           | 0  | 1  | 0  |
| A3 | 18                                          | 0                           | 2  | 0  | 0  |
| B1 | 13                                          | 3                           | 0  | 4  | 0  |
| D3 | 19                                          | 1                           | 0  | 0  | 0  |
